# Supplementary material for: Identification of (Z)-8-Heptadecene and n-Pentadecane as Electrophysiologically Active Compounds in Ophrys insectifera and Its Argogorytes Pollinator
Source: PubMed Central journal article supplement (PMC7014428; doi:10.3390/ijms21020620), 2020-01-17

# Identification of (*Z*)-8-heptadecene and *n*-pentadecane as electrophysiologically active compounds in *Ophrys insectifera* and its *Argogorytes* pollinator

Björn Bohman, Alyssa M. Weinstein, Raimondas Mozuraitis, Gavin R. Flematti and Anna-Karin Borg-Karlson

Supplementary Materials

NMR-spectra of synthetically prepared compounds **1**, **3**, **4** and **5**

**<sup>1</sup>H NMR (600 MHz, CDCl<sub>3</sub>)**

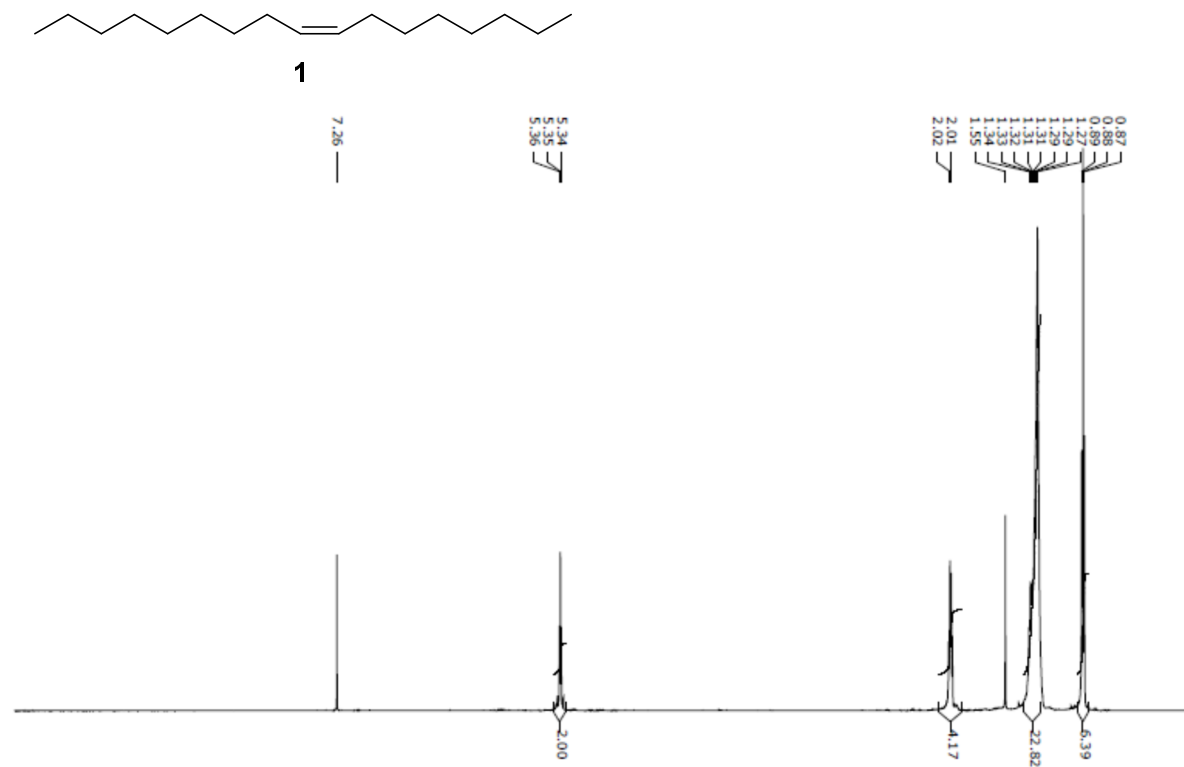

**<sup>13</sup>C NMR (150 MHz, CDCl<sub>3</sub>)**

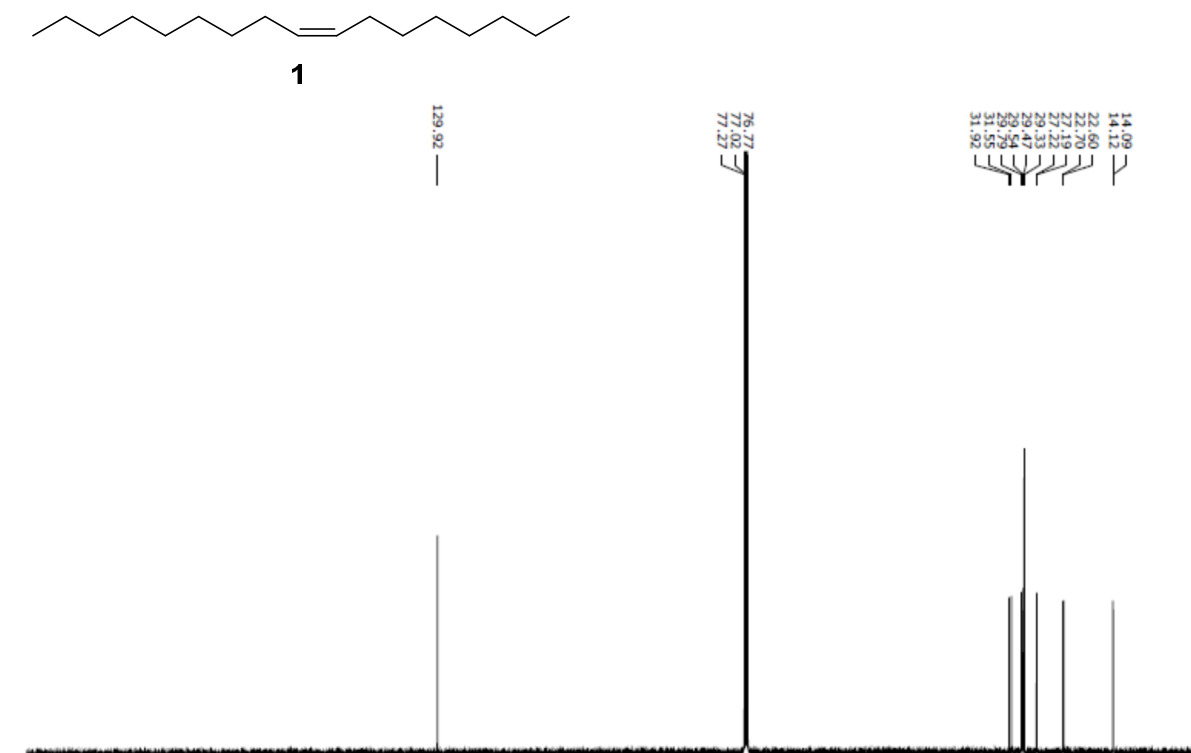

**<sup>1</sup>H NMR (600 MHz, CDCl<sub>3</sub>)**

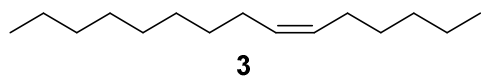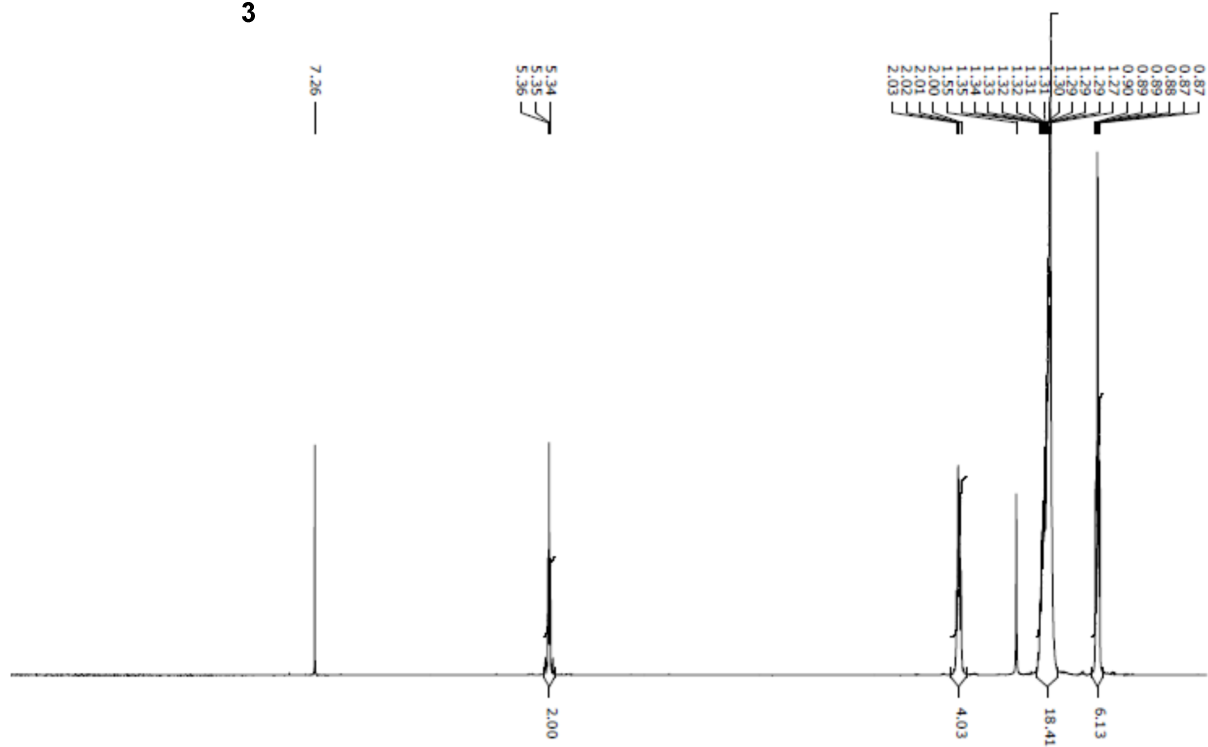

**<sup>13</sup>C NMR (150 MHz, CDCl<sub>3</sub>)**

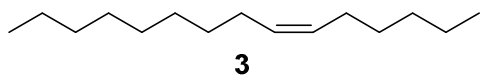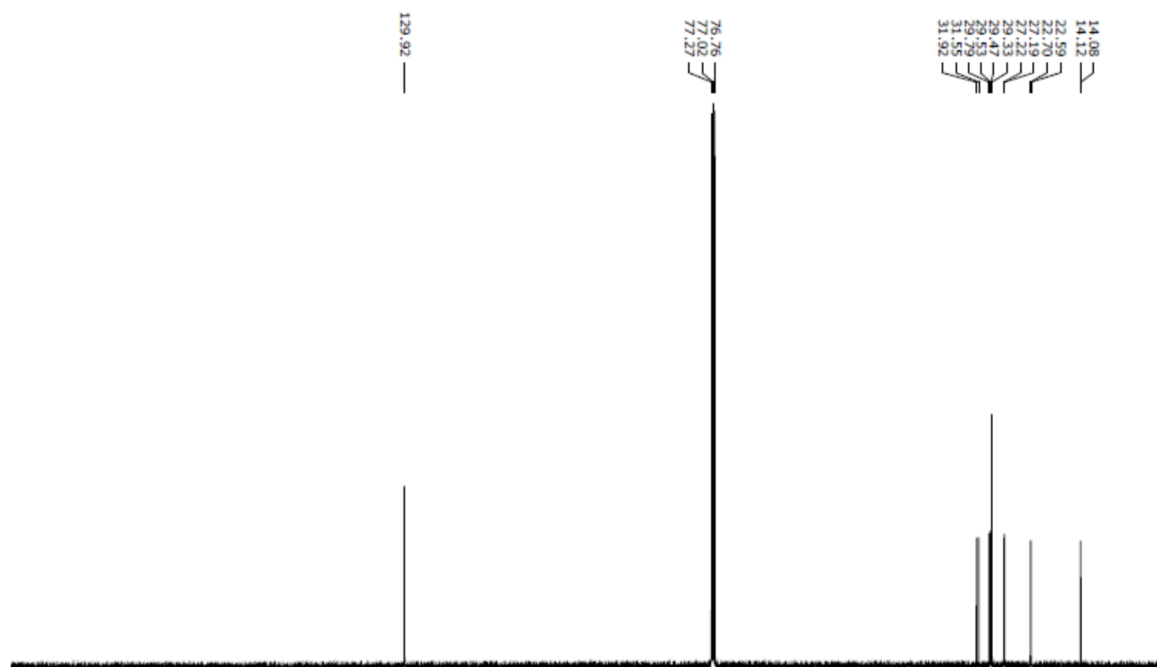

**<sup>1</sup>H NMR (600 MHz, CDCl<sub>3</sub>)**

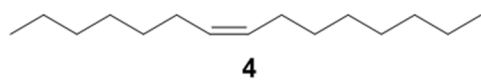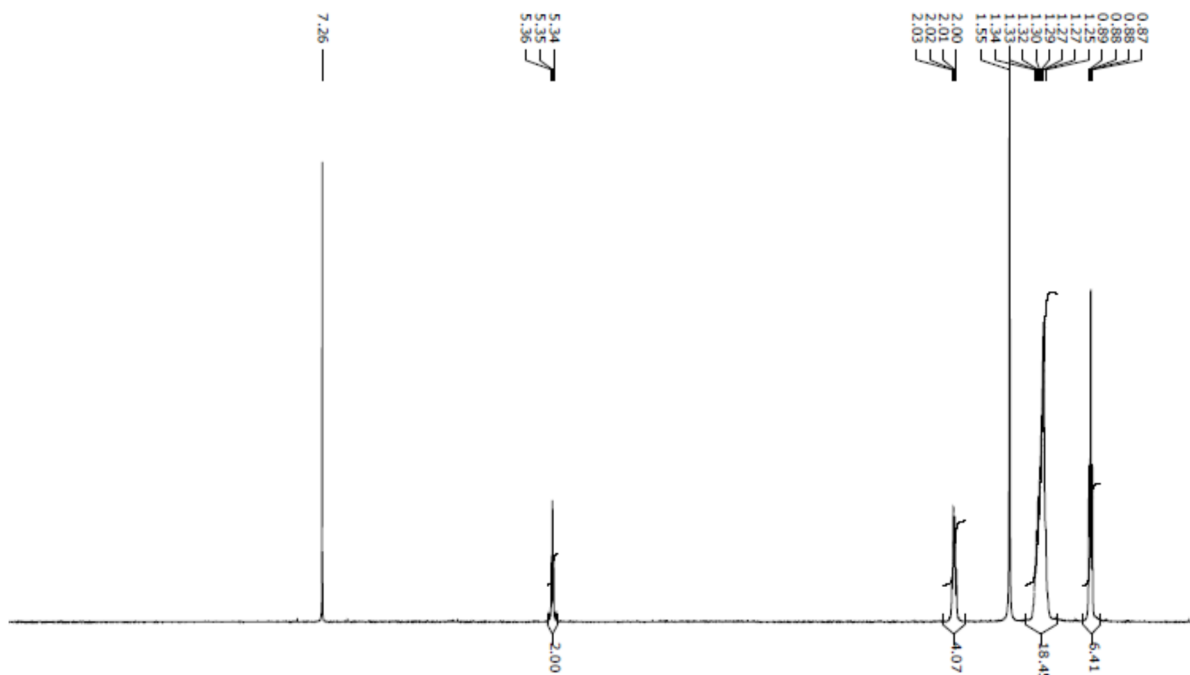

**<sup>13</sup>C NMR (150 MHz, CDCl<sub>3</sub>)**

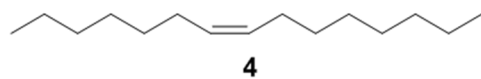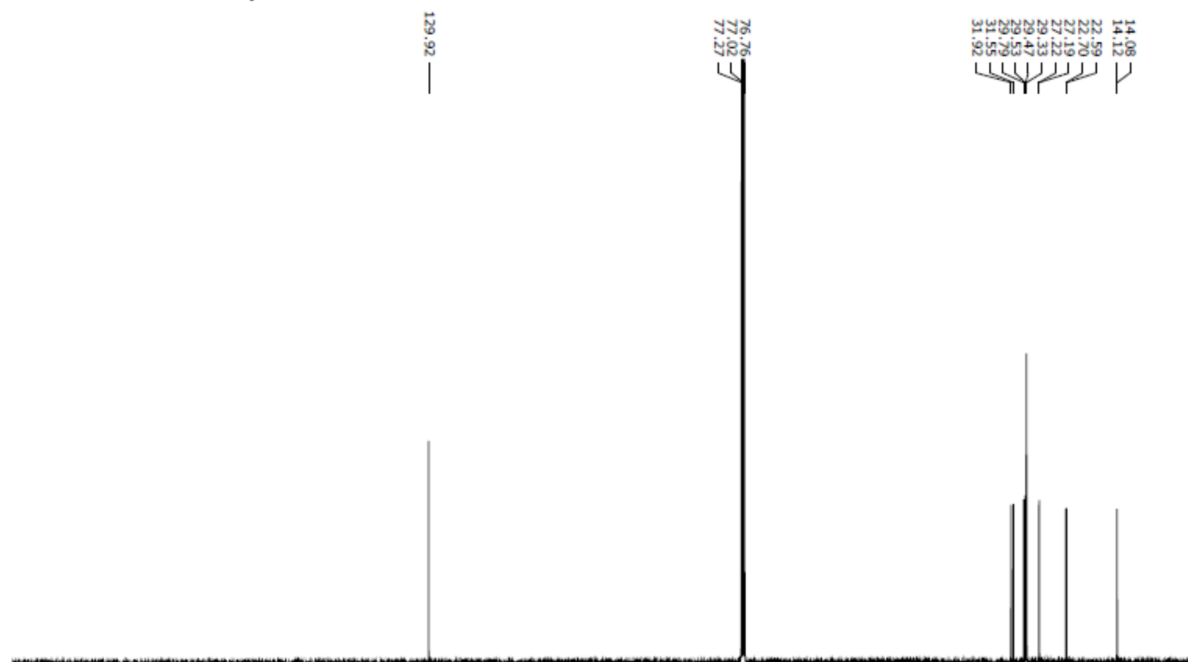

**<sup>1</sup>H NMR (500 MHz, CDCl<sub>3</sub>)**

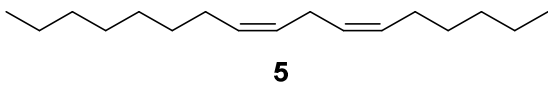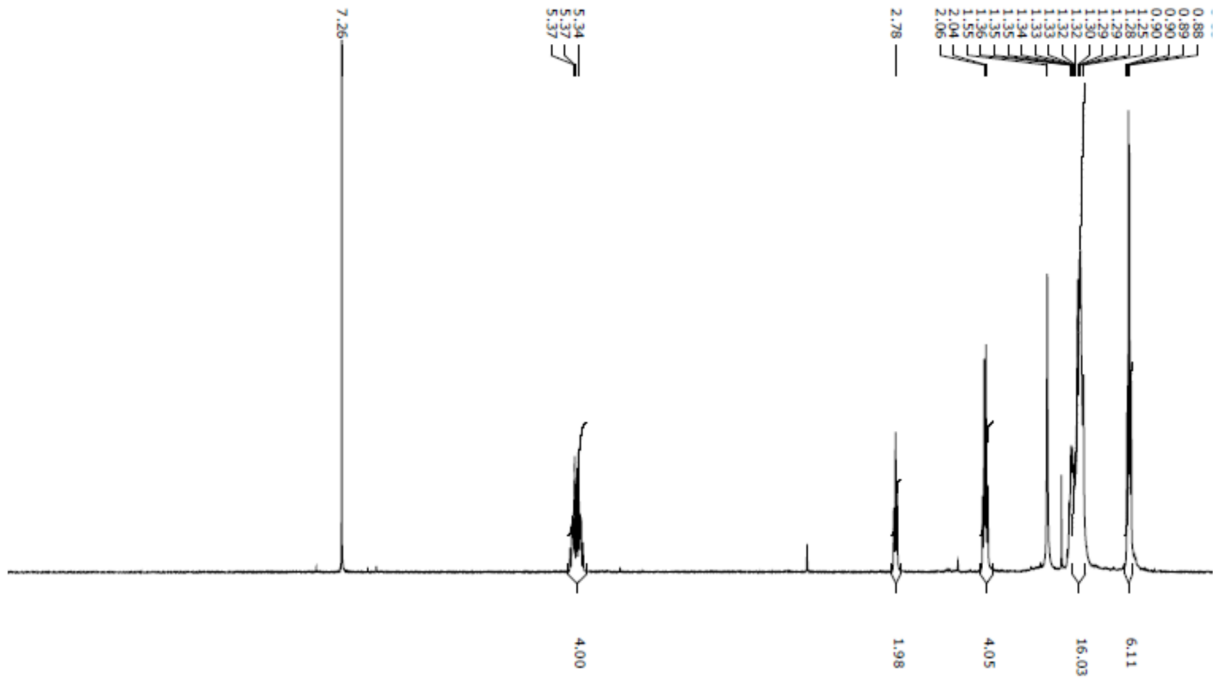

**<sup>13</sup>C NMR (125 MHz, CDCl<sub>3</sub>)**

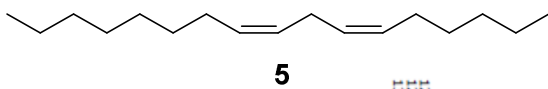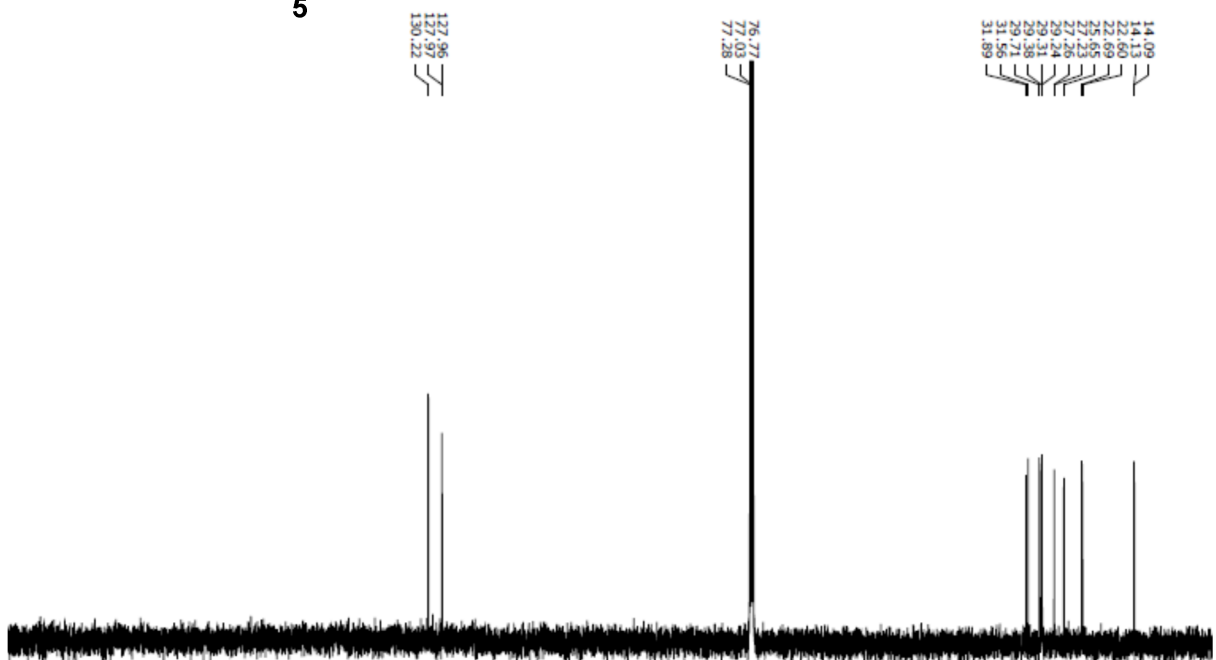

Supplement: ijms-21-00620-s001.pdf [file ijms-21-00620-s001.pdf]
